# Supplementary material for: Using surgical wrapping material for the fabrication of respirator masks
Source: PubMed Central journal article supplement (PMC7373262; doi:10.1371/journal.pone.0236239), 2020-07-21
Supplement: pone.0236239.s001.pdf [file pone.0236239.s001.pdf]

## Filtration efficiency test

|                                      |                                  |                  | 0,3µm         | 0,5µm         | 3,0µm         |               |
|--------------------------------------|----------------------------------|------------------|---------------|---------------|---------------|---------------|
| Unsterilised material (from package) | White layer only                 | Sample 1 (n = 4) | 3/4/2020      | 46.40%        | 68.44%        | 92.38%        |
|                                      |                                  | Sample 2 (n = 4) | 3/4/2020      | 51.13%        | 73.49%        | 93.41%        |
|                                      | <b>Averaged</b>                  |                  |               | <b>48.76%</b> | <b>70.97%</b> | <b>92.89%</b> |
|                                      | <b>Intersample Standard Dev.</b> |                  |               | <b>3.34%</b>  | <b>3.58%</b>  | <b>0.73%</b>  |
|                                      | Blue layer only                  | Sample 3 (n = 4) | 3/4/2020      | 48.37%        | 68.97%        | 92.87%        |
|                                      |                                  | Sample 4 (n = 4) | 3/4/2020      | 49.91%        | 70.65%        | 93.90%        |
|                                      | <b>Averaged</b>                  |                  |               | <b>49.14%</b> | <b>69.81%</b> | <b>93.39%</b> |
|                                      | <b>Intersample Standard Dev.</b> |                  |               | <b>1.09%</b>  | <b>1.19%</b>  | <b>0.73%</b>  |
|                                      | Single Layer                     | Sample 5 (n = 4) | 3/4/2020      | 70.42%        | 90.17%        | 99.65%        |
|                                      |                                  | Sample 6 (n = 4) | 3/4/2020      | 69.74%        | 89.19%        | 99.84%        |
| <b>Averaged</b>                      |                                  |                  | <b>70.08%</b> | <b>89.68%</b> | <b>99.74%</b> |               |
| <b>Intersample Standard Dev.</b>     |                                  |                  | <b>0.48%</b>  | <b>0.70%</b>  | <b>0.13%</b>  |               |
| Double Layer                         | Sample 7 (n = 4)                 | 3/4/2020         | 87.99%        | 98.35%        | 99.98%        |               |
|                                      | Sample 8 (n = 4)                 | 3/4/2020         | 87.38%        | 98.21%        | 99.98%        |               |
|                                      | Sample 53 (n = 4)                | 3/4/2020         | 84.42%        | 97.50%        | 99.96%        |               |
| <b>Averaged</b>                      |                                  |                  | <b>86.60%</b> | <b>98.02%</b> | <b>99.97%</b> |               |
| <b>Intersample Standard Dev.</b>     |                                  |                  | <b>1.91%</b>  | <b>0.46%</b>  | <b>0.01%</b>  |               |
| Double Layer, reversed               | Sample 9 (n = 4)                 | 3/4/2020         | 85.35%        | 97.79%        | 99.96%        |               |
|                                      | Sample 10 (n = 4)                | 3/4/2020         | 83.95%        | 97.34%        | 100.00%       |               |
| <b>Averaged</b>                      |                                  |                  | <b>84.65%</b> | <b>97.57%</b> | <b>99.98%</b> |               |
| <b>Intersample Standard Dev.</b>     |                                  |                  | <b>0.99%</b>  | <b>0.32%</b>  | <b>0.03%</b>  |               |

**Steam Sterilised (15min, 121 degrees Celsius, 2 atm)**

|                                       |                   |           |               |               |                |
|---------------------------------------|-------------------|-----------|---------------|---------------|----------------|
| Double Layer, after use<br>20 minutes | Sample 11 (n = 4) | 3/4/2020  | 87.64%        | 98.64%        | 100.00%        |
|                                       | Sample 12 (n = 4) | 3/4/2020  | 87.54%        | 98.63%        | 100.00%        |
| <b>Averaged</b>                       |                   |           | <b>87.59%</b> | <b>98.63%</b> | <b>100.00%</b> |
| <b>Intersample Standard Dev.</b>      |                   |           | <b>0.07%</b>  | <b>0.00%</b>  | <b>0.00%</b>   |
| Triple layer                          | Sample 13 (n = 4) | 3/4/2020  | 94.10%        | 99.51%        | 99.98%         |
|                                       | Sample 14 (n = 4) | 3/4/2020  | 93.58%        | 99.39%        | 100.00%        |
| <b>Averaged</b>                       |                   |           | <b>93.84%</b> | <b>99.45%</b> | <b>99.99%</b>  |
| <b>Intersample Standard Dev.</b>      |                   |           | <b>0.37%</b>  | <b>0.08%</b>  | <b>0.01%</b>   |
| Single Layer, 1x sterilized           | Sample 15 (n = 4) | 3/4/2020  | 66.15%        | 87.14%        | 99.40%         |
|                                       | Sample 16 (n = 4) | 3/4/2020  | 66.58%        | 87.24%        | 99.73%         |
| <b>Averaged</b>                       |                   |           | <b>66.37%</b> | <b>87.19%</b> | <b>99.57%</b>  |
| <b>Intersample Standard Dev.</b>      |                   |           | <b>0.31%</b>  | <b>0.07%</b>  | <b>0.23%</b>   |
| Double Layer, 1x sterilized           | Sample 17 (n = 4) | 3/4/2020  | 80.63%        | 95.91%        | 100.00%        |
|                                       | Sample 18 (n = 4) | 3/4/2020  | 80.16%        | 95.67%        | 99.98%         |
| <b>Averaged</b>                       |                   |           | <b>80.39%</b> | <b>95.79%</b> | <b>99.99%</b>  |
| <b>Intersample Standard Dev.</b>      |                   |           | <b>0.33%</b>  | <b>0.17%</b>  | <b>0.01%</b>   |
| Triple layer, 1x sterilized           | Sample 19 (n = 4) | 3/4/2020  | 87.98%        | 98.35%        | 99.96%         |
|                                       | Sample 20 (n = 4) | 3/4/2020  | 88.57%        | 98.52%        | 99.98%         |
|                                       | Sample 21 (n = 4) | 12/5/2020 | 82.74%        | 98.94%        | 99.91%         |
|                                       | Sample 22 (n = 4) | 12/5/2020 | 83.71%        | 99.02%        | 99.97%         |
|                                       | Sample 23 (n = 4) | 12/5/2020 | 83.77%        | 98.98%        | 99.99%         |
|                                       | Sample 24 (n = 4) | 12/5/2020 | 83.91%        | 98.95%        | 99.97%         |
| <b>Averaged</b>                       |                   |           | <b>85.11%</b> | <b>98.44%</b> | <b>99.97%</b>  |
| <b>Intersample Standard Dev.</b>      |                   |           | <b>2.49%</b>  | <b>0.28%</b>  | <b>0.03%</b>   |

|                                  |                   |           |               |               |               |
|----------------------------------|-------------------|-----------|---------------|---------------|---------------|
| Triple layer, 2x sterilized      | Sample 25 (n = 4) | 12/5/2020 | 89.08%        | 99.52%        | 99.97%        |
|                                  | Sample 26 (n = 4) | 12/5/2020 | 86.52%        | 99.26%        | 99.93%        |
|                                  | Sample 27 (n = 4) | 12/5/2020 | 87.97%        | 99.42%        | 99.97%        |
|                                  | Sample 28 (n = 4) | 12/5/2020 | 86.51%        | 99.31%        | 99.96%        |
| <b>Averaged</b>                  |                   |           | <b>87.52%</b> | <b>99.38%</b> | <b>99.96%</b> |
| <b>Intersample Standard Dev.</b> |                   |           | <b>1.25%</b>  | <b>0.12%</b>  | <b>0.02%</b>  |
| Triple layer, 3x sterilized      | Sample 29 (n = 4) | 12/5/2020 | 81.71%        | 98.74%        | 99.97%        |
|                                  | Sample 30 (n = 4) | 12/5/2020 | 82.88%        | 98.94%        | 99.92%        |
|                                  | Sample 31 (n = 4) | 12/5/2020 | 83.66%        | 99.01%        | 99.97%        |
|                                  | Sample 32 (n = 4) | 12/5/2020 | 82.07%        | 98.80%        | 99.99%        |
| <b>Averaged</b>                  |                   |           | <b>82.58%</b> | <b>98.87%</b> | <b>99.97%</b> |
| <b>Intersample Standard Dev.</b> |                   |           | <b>0.87%</b>  | <b>0.12%</b>  | <b>0.03%</b>  |
| Triple layer, 4x sterilized      | Sample 33 (n = 4) | 12/5/2020 | 86.00%        | 99.27%        | 99.96%        |
|                                  | Sample 34 (n = 4) | 12/5/2020 | 86.36%        | 99.29%        | 99.90%        |
|                                  | Sample 35 (n = 4) | 12/5/2020 | 85.60%        | 99.21%        | 99.97%        |
|                                  | Sample 36 (n = 4) | 12/5/2020 | 85.27%        | 99.17%        | 99.92%        |
| <b>Averaged</b>                  |                   |           | <b>85.81%</b> | <b>99.23%</b> | <b>99.94%</b> |
| <b>Intersample Standard Dev.</b> |                   |           | <b>0.47%</b>  | <b>0.05%</b>  | <b>0.03%</b>  |
| Triple layer, 5x sterilized      | Sample 37 (n = 4) | 12/5/2020 | 83.61%        | 99.00%        | 99.95%        |
|                                  | Sample 38 (n = 4) | 12/5/2020 | 84.71%        | 99.16%        | 99.98%        |
|                                  | Sample 39 (n = 4) | 12/5/2020 | 83.19%        | 98.98%        | 99.96%        |
|                                  | Sample 40 (n = 4) | 12/5/2020 | 82.42%        | 98.88%        | 99.99%        |
| <b>Averaged</b>                  |                   |           | <b>83.48%</b> | <b>99.00%</b> | <b>99.97%</b> |
| <b>Intersample Standard Dev.</b> |                   |           | <b>0.96%</b>  | <b>0.11%</b>  | <b>0.02%</b>  |

**Comparison with commercial Masks & Respirators**

|                                  |           |           |               |               |                |
|----------------------------------|-----------|-----------|---------------|---------------|----------------|
| Surgical Mask                    | Sample 41 | 12/5/2020 | 55.89%        | 89.26%        | 98.96%         |
|                                  | Sample 42 | 12/5/2020 | 51.48%        | 87.47%        | 98.01%         |
|                                  | Sample 43 | 12/5/2020 | 57.64%        | 89.86%        | 99.48%         |
|                                  | Sample 44 | 12/5/2020 | 53.07%        | 87.84%        | 99.22%         |
| <b>Averaged</b>                  |           |           | <b>54.52%</b> | <b>88.61%</b> | <b>98.92%</b>  |
| <b>Intersample Standard Dev.</b> |           |           | <b>2.77%</b>  | <b>1.13%</b>  | <b>0.64%</b>   |
| Disposable Face Mask FFP2        | Sample 45 | 12/5/2020 | 93.55%        | 99.52%        | 100.00%        |
|                                  | Sample 46 | 12/5/2020 | 93.93%        | 99.58%        | 100.00%        |
|                                  | Sample 47 | 12/5/2020 | 94.35%        | 99.61%        | 100.00%        |
|                                  | Sample 48 | 12/5/2020 | 94.47%        | 99.57%        | 100.00%        |
| <b>Averaged</b>                  |           |           | <b>94.08%</b> | <b>99.57%</b> | <b>100.00%</b> |
| <b>Intersample Standard Dev.</b> |           |           | <b>0.42%</b>  | <b>0.04%</b>  | <b>0.00%</b>   |
| 3M 8320 FFP2 NR D Mask           | Sample 49 | 12/5/2020 | 98.91%        | 99.90%        | 99.91%         |
|                                  | Sample 50 | 12/5/2020 | 95.91%        | 99.65%        | 100.00%        |
|                                  | Sample 51 | 12/5/2020 | 98.10%        | 99.78%        | 100.00%        |
|                                  | Sample 52 | 12/5/2020 | 96.84%        | 99.65%        | 99.83%         |
| <b>Averaged</b>                  |           |           | <b>97.44%</b> | <b>99.75%</b> | <b>99.94%</b>  |
| <b>Intersample Standard Dev.</b> |           |           | <b>1.33%</b>  | <b>0.12%</b>  | <b>0.08%</b>   |
