# Supplementary material for: Using surgical wrapping material for the fabrication of respirator masks
Source: PubMed Central journal article supplement (PMC7373262; doi:10.1371/journal.pone.0236239), 2020-07-21
Supplement: pone.0236239.s002.pdf [file pone.0236239.s002.pdf]

## Halyard Quickcheck H300 material

| Sample #                              | Code          | Description                                                                 | 0,3µm         | 0,5µm         | 3µm           |
|---------------------------------------|---------------|-----------------------------------------------------------------------------|---------------|---------------|---------------|
| <b>Background Measurements #1</b>     |               |                                                                             | 382237        | 148794        | 1131          |
|                                       |               |                                                                             | 384541        | 150992        | 1351          |
|                                       |               |                                                                             | 381320        | 149019        | 1219          |
|                                       |               |                                                                             | 379900        | 149255        | 1172          |
| <b>Average particles</b>              |               |                                                                             | <b>382000</b> | <b>149515</b> | <b>1218</b>   |
| <b>Sample 1</b>                       | 03042020-CSDr | Sample 1, White layer only of Halyard Quickcheck H300                       | 149736        | 31990         | 43            |
|                                       | 03042020-CSDr | <i>Background Measurements #2 used for calculation of filter efficiency</i> | 149779        | 32265         | 59            |
|                                       | 03042020-CSDr |                                                                             | 150152        | 32037         | 64            |
|                                       | 03042020-CSDr |                                                                             | 148730        | 31759         | 34            |
| <b>Average particles</b>              |               |                                                                             | <b>149599</b> | <b>32013</b>  | <b>50</b>     |
| <b>% Filter collection efficiency</b> |               |                                                                             | <b>46.40%</b> | <b>68.44%</b> | <b>92.38%</b> |
| <b>Sample 2</b>                       | 03042020-CSDs | Sample 2, White layer only of Halyard Quickcheck H300                       | 137656        | 27094         | 41            |
|                                       | 03042020-CSDs | <i>Background Measurements #2 used for calculation of filter efficiency</i> | 136845        | 26952         | 45            |
|                                       | 03042020-CSDs |                                                                             | 135309        | 26686         | 55            |
|                                       | 03042020-CSDs |                                                                             | 135784        | 26802         | 32            |
| <b>Average particles</b>              |               |                                                                             | <b>136399</b> | <b>26884</b>  | <b>43</b>     |
| <b>% Filter collection efficiency</b> |               |                                                                             | <b>51.13%</b> | <b>73.49%</b> | <b>93.41%</b> |
| <b>Sample 3</b>                       | 03042020-CSDt | Sample 3, Blue layer only of Halyard Quickcheck H300                        | 145796        | 31630         | 57            |
|                                       | 03042020-CSDt | <i>Background Measurements #2 used for calculation of filter efficiency</i> | 144838        | 31698         | 44            |
|                                       | 03042020-CSDt |                                                                             | 143250        | 31574         | 47            |
|                                       | 03042020-CSDt |                                                                             | 142487        | 30974         | 39            |
| <b>Average particles</b>              |               |                                                                             | <b>144093</b> | <b>31469</b>  | <b>47</b>     |
| <b>% Filter collection efficiency</b> |               |                                                                             | <b>48.37%</b> | <b>68.97%</b> | <b>92.87%</b> |

|                 |               |                                                                             |                                       |               |               |               |
|-----------------|---------------|-----------------------------------------------------------------------------|---------------------------------------|---------------|---------------|---------------|
| <b>Sample 4</b> | 03042020-CSDu | Sample 4, Blue layer only of Halyard Quickcheck H300                        | 140824                                | 29824         | 44            |               |
|                 | 03042020-CSDu | <i>Background Measurements #2 used for calculation of filter efficiency</i> | 140301                                | 29847         | 35            |               |
|                 | 03042020-CSDu |                                                                             | 137981                                | 29649         | 52            |               |
|                 | 03042020-CSDu |                                                                             | 140129                                | 29740         | 29            |               |
|                 |               |                                                                             | <b>Average particles</b>              | <b>139809</b> | <b>29765</b>  | <b>40</b>     |
|                 |               |                                                                             | <b>% Filter collection efficiency</b> | <b>49.91%</b> | <b>70.65%</b> | <b>93.90%</b> |
| <b>Sample 5</b> | 03042020-CSDc | Sample 5, Single layer Halyard QuickCheck H300                              | 112157                                | 14339         | 7             |               |
|                 | 03042020-CSDc | <i>Background Measurements #1 used for calculation of filter efficiency</i> | 112933                                | 14682         | 5             |               |
|                 | 03042020-CSDc |                                                                             | 113143                                | 14911         | 1             |               |
|                 | 03042020-CSDc |                                                                             | 113738                                | 14837         | 4             |               |
|                 |               |                                                                             | <b>Average particles</b>              | <b>112993</b> | <b>14692</b>  | <b>4</b>      |
|                 |               |                                                                             | <b>% Filter collection efficiency</b> | <b>70.42%</b> | <b>90.17%</b> | <b>99.65%</b> |
| <b>Sample 6</b> | 03042020-CSDd | Sample 6, Single layer Halyard QuickCheck H300                              | 116547                                | 16297         | 1             |               |
|                 | 03042020-CSDd | <i>Background Measurements #1 used for calculation of filter efficiency</i> | 115368                                | 16135         | 0             |               |
|                 | 03042020-CSDd |                                                                             | 115165                                | 15847         | 5             |               |
|                 | 03042020-CSDd |                                                                             | 115297                                | 16372         | 2             |               |
|                 |               |                                                                             | <b>Average particles</b>              | <b>115594</b> | <b>16163</b>  | <b>2</b>      |
|                 |               |                                                                             | <b>% Filter collection efficiency</b> | <b>69.74%</b> | <b>89.19%</b> | <b>99.84%</b> |
| <b>Sample 7</b> | 03042020-CSDa | Sample 7, Double layer Halyard QuickCheck H300                              | 45893                                 | 2329          | 1             |               |
|                 | 03042020-CSDa | <i>Background Measurements #1 used for calculation of filter efficiency</i> | 46009                                 | 2458          | 0             |               |
|                 | 03042020-CSDa |                                                                             | 45822                                 | 2512          | 0             |               |
|                 | 03042020-CSDa |                                                                             | 45771                                 | 2595          | 0             |               |
|                 |               |                                                                             | <b>Average particles</b>              | <b>45874</b>  | <b>2474</b>   | <b>0</b>      |
|                 |               |                                                                             | <b>% Filter collection efficiency</b> | <b>87.99%</b> | <b>98.35%</b> | <b>99.98%</b> |
| <b>Sample 8</b> | 03042020-CSDb | Sample 8, Double layer Halyard QuickCheck H300                              | 48265                                 | 2642          | 1             |               |
|                 | 03042020-CSDb | <i>Background Measurements #1 used for calculation of filter efficiency</i> | 47795                                 | 2688          | 0             |               |
|                 | 03042020-CSDb |                                                                             | 48247                                 | 2683          | 0             |               |
|                 | 03042020-CSDb |                                                                             | 48553                                 | 2691          | 0             |               |
|                 |               |                                                                             | <b>Average particles</b>              | <b>48215</b>  | <b>2676</b>   | <b>0</b>      |
|                 |               |                                                                             | <b>% Filter collection efficiency</b> | <b>87.38%</b> | <b>98.21%</b> | <b>99.98%</b> |

|                  |               |                                                                             |                                       |               |               |                |
|------------------|---------------|-----------------------------------------------------------------------------|---------------------------------------|---------------|---------------|----------------|
| <b>Sample 9</b>  | 03042020-CSDn | Sample 9, Double layer Halyard QuickCheck H300 - reversed                   | 41124                                 | 2228          | 0             |                |
|                  | 03042020-CSDn | <i>Background Measurements #2 used for calculation of filter efficiency</i> | 40872                                 | 2192          | 0             |                |
|                  | 03042020-CSDn |                                                                             | 40643                                 | 2246          | 0             |                |
|                  | 03042020-CSDn |                                                                             | 40963                                 | 2285          | 1             |                |
|                  |               |                                                                             | <b>Average particles</b>              | <b>40901</b>  | <b>2238</b>   | <b>0</b>       |
|                  |               |                                                                             | <b>% Filter collection efficiency</b> | <b>85.35%</b> | <b>97.79%</b> | <b>99.96%</b>  |
| <b>Sample 10</b> | 03042020-CSDo | Sample 10, Double layer Halyard QuickCheck H300 - reversed                  | 44807                                 | 2671          | 0             |                |
|                  | 03042020-CSDo | <i>Background Measurements #2 used for calculation of filter efficiency</i> | 45197                                 | 2677          | 0             |                |
|                  | 03042020-CSDo |                                                                             | 45079                                 | 2797          | 0             |                |
|                  | 03042020-CSDo |                                                                             | 44115                                 | 2640          | 0             |                |
|                  |               |                                                                             | <b>Average particles</b>              | <b>44800</b>  | <b>2696</b>   | <b>0</b>       |
|                  |               |                                                                             | <b>% Filter collection efficiency</b> | <b>83.95%</b> | <b>97.34%</b> | <b>100.00%</b> |
| <b>Sample 11</b> | 03042020-CSDv | Sample 11, Double Layer Halyard Quickcheck H300 after 20 min wearing        | 34432                                 | 1365          | 0             |                |
|                  | 03042020-CSDv | <i>Background Measurements #2 used for calculation of filter efficiency</i> | 34240                                 | 1422          | 0             |                |
|                  | 03042020-CSDv |                                                                             | 34764                                 | 1369          | 0             |                |
|                  | 03042020-CSDv |                                                                             | 34545                                 | 1375          | 0             |                |
|                  |               |                                                                             | <b>Average particles</b>              | <b>34495</b>  | <b>1383</b>   | <b>0</b>       |
|                  |               |                                                                             | <b>% Filter collection efficiency</b> | <b>87.64%</b> | <b>98.64%</b> | <b>100.00%</b> |
| <b>Sample 12</b> | 03042020-CSDv | Sample 12, Double Layer Halyard Quickcheck H300 after 20 min wearing        | 34870                                 | 1401          | 0             |                |
|                  | 03042020-CSDv | <i>Background Measurements #2 used for calculation of filter efficiency</i> | 35096                                 | 1390          | 0             |                |
|                  | 03042020-CSDv |                                                                             | 34742                                 | 1403          | 0             |                |
|                  | 03042020-CSDv |                                                                             | 34397                                 | 1364          | 0             |                |
|                  |               |                                                                             | <b>Average particles</b>              | <b>34776</b>  | <b>1390</b>   | <b>0</b>       |
|                  |               |                                                                             | <b>% Filter collection efficiency</b> | <b>87.54%</b> | <b>98.63%</b> | <b>100.00%</b> |
| <b>Sample 13</b> | 03042020-CSDe | Sample 13, Triple layer Halyard QuickCheck H300                             | 22612                                 | 764           | 1             |                |
|                  | 03042020-CSDe | <i>Background Measurements #1 used for calculation of filter efficiency</i> | 22557                                 | 764           | 0             |                |
|                  | 03042020-CSDe |                                                                             | 22314                                 | 695           | 0             |                |
|                  | 03042020-CSDe |                                                                             | 22681                                 | 707           | 0             |                |
|                  |               |                                                                             | <b>Average particles</b>              | <b>22541</b>  | <b>733</b>    | <b>0</b>       |
|                  |               |                                                                             | <b>% Filter collection efficiency</b> | <b>94.10%</b> | <b>99.51%</b> | <b>99.98%</b>  |

|                  |               |                                                                             |                                       |               |               |                |
|------------------|---------------|-----------------------------------------------------------------------------|---------------------------------------|---------------|---------------|----------------|
| <b>Sample 14</b> | 03042020-CSDf | Sample 14, Triple layer Halyard QuickCheck H300                             | 24783                                 | 961           | 0             |                |
|                  | 03042020-CSDf | <i>Background Measurements #1 used for calculation of filter efficiency</i> | 24535                                 | 863           | 0             |                |
|                  | 03042020-CSDf |                                                                             | 24631                                 | 894           | 0             |                |
|                  | 03042020-CSDf |                                                                             | 24110                                 | 907           | 0             |                |
|                  |               |                                                                             | <b>Average particles</b>              | <b>24515</b>  | <b>906</b>    | <b>0</b>       |
|                  |               |                                                                             | <b>% Filter collection efficiency</b> | <b>93.58%</b> | <b>99.39%</b> | <b>100.00%</b> |
| <b>Sample 15</b> | 03042020-CSDi | Sample 15, Single layer Halyard QuickCheck H300                             | 128766                                | 19050         | 4             |                |
|                  | 03042020-CSDi | Sterilized: 1x, 121 degrees Celsius, 2 atm, 15 min                          | 128336                                | 19107         | 11            |                |
|                  | 03042020-CSDi | <i>Background Measurements #1 used for calculation of filter efficiency</i> | 130178                                | 19365         | 8             |                |
|                  | 03042020-CSDi |                                                                             | 129979                                | 19384         | 6             |                |
|                  |               |                                                                             | <b>Average particles</b>              | <b>129315</b> | <b>19227</b>  | <b>7</b>       |
|                  |               |                                                                             | <b>% Filter collection efficiency</b> | <b>66.15%</b> | <b>87.14%</b> | <b>99.40%</b>  |
| <b>Sample 16</b> | 03042020-CSDj | Sample 16, Single layer Halyard QuickCheck H300                             | 127472                                | 19303         | 2             |                |
|                  | 03042020-CSDj | Sterilized: 1x, 121 degrees Celsius, 2 atm, 15 min                          | 127351                                | 18840         | 2             |                |
|                  | 03042020-CSDj | <i>Background Measurements #1 used for calculation of filter efficiency</i> | 128150                                | 19062         | 6             |                |
|                  | 03042020-CSDj |                                                                             | 127637                                | 19087         | 3             |                |
|                  |               |                                                                             | <b>Average particles</b>              | <b>127653</b> | <b>19073</b>  | <b>3</b>       |
|                  |               |                                                                             | <b>% Filter collection efficiency</b> | <b>66.58%</b> | <b>87.24%</b> | <b>99.73%</b>  |
| <b>Sample 17</b> | 03042020-CSDg | Double layer Halyard QuickCheck H300                                        | 73850                                 | 6206          | 0             |                |
|                  | 03042020-CSDg | Sterilized: 1x, 121 degrees Celsius, 2 atm, 15 min                          | 74493                                 | 6231          | 0             |                |
|                  | 03042020-CSDg | <i>Background Measurements #1 used for calculation of filter efficiency</i> | 73894                                 | 6121          | 0             |                |
|                  | 03042020-CSDg |                                                                             | 73775                                 | 5892          | 0             |                |
|                  |               |                                                                             | <b>Average particles</b>              | <b>74003</b>  | <b>6113</b>   | <b>0</b>       |
|                  |               |                                                                             | <b>% Filter collection efficiency</b> | <b>80.63%</b> | <b>95.91%</b> | <b>100.00%</b> |
| <b>Sample 18</b> | 03042020-CSDh | Triple layer Halyard QuickCheck H300                                        | 75495                                 | 6477          | 0             |                |
|                  | 03042020-CSDh | Sterilized: 1x, 121 degrees Celsius, 2 atm, 15 min                          | 76244                                 | 6537          | 0             |                |
|                  | 03042020-CSDh | <i>Background Measurements #1 used for calculation of filter efficiency</i> | 75886                                 | 6565          | 1             |                |
|                  | 03042020-CSDh |                                                                             | 75530                                 | 6291          | 0             |                |
|                  |               |                                                                             | <b>Average particles</b>              | <b>75789</b>  | <b>6468</b>   | <b>0</b>       |
|                  |               |                                                                             | <b>% Filter collection efficiency</b> | <b>80.16%</b> | <b>95.67%</b> | <b>99.98%</b>  |

|                                   |               |                                                                             |                                       |               |               |               |
|-----------------------------------|---------------|-----------------------------------------------------------------------------|---------------------------------------|---------------|---------------|---------------|
| <b>Sample 19</b>                  | 03042020-CSDk | Triple layer Halyard QuickCheck H300                                        | 46148                                 | 2485          | 2             |               |
|                                   | 03042020-CSDk | Sterilized: 1x, 121 degrees Celsius, 2 atm, 115 min                         | 45969                                 | 2544          | 0             |               |
|                                   | 03042020-CSDk | <i>Background Measurements #1 used for calculation of filter efficiency</i> | 46072                                 | 2350          | 0             |               |
|                                   | 03042020-CSDk |                                                                             | 45516                                 | 2469          | 0             |               |
|                                   |               |                                                                             | <b>Average particles</b>              | <b>45926</b>  | <b>2462</b>   | <b>1</b>      |
|                                   |               |                                                                             | <b>% Filter collection efficiency</b> | <b>87.98%</b> | <b>98.35%</b> | <b>99.96%</b> |
| <b>Sample 20</b>                  | 03042020-CSDI | Triple layer Halyard QuickCheck H300                                        | 43836                                 | 2260          | 0             |               |
|                                   | 03042020-CSDI | Sterilized: 1x, 121 degrees Celsius, 2 atm, 15 min                          | 43722                                 | 2211          | 1             |               |
|                                   | 03042020-CSDI | <i>Background Measurements #1 used for calculation of filter efficiency</i> | 43386                                 | 2267          | 0             |               |
|                                   | 03042020-CSDI |                                                                             | 43664                                 | 2133          | 0             |               |
|                                   |               |                                                                             | <b>Average particles</b>              | <b>43652</b>  | <b>2218</b>   | <b>0</b>      |
|                                   |               |                                                                             | <b>% Filter collection efficiency</b> | <b>88.57%</b> | <b>98.52%</b> | <b>99.98%</b> |
| <b>Background measurements #2</b> |               |                                                                             | 281752                                | 101437        | 635           |               |
|                                   |               |                                                                             | 281570                                | 102470        | 655           |               |
|                                   |               |                                                                             | 277974                                | 101341        | 705           |               |
|                                   |               |                                                                             | 275088                                | 100446        | 629           |               |
|                                   |               |                                                                             | <b>Average particles</b>              | <b>279096</b> | <b>101424</b> | <b>656</b>    |
| <b>Sample 53</b>                  | 03042020-CSDp | Double layer Halyard QuickCheck H300                                        | 43671                                 | 2462          | 0             |               |
|                                   | 03042020-CSDp | <i>Background Measurements #2 used for calculation of filter efficiency</i> | 43601                                 | 2650          | 0             |               |
|                                   | 03042020-CSDp |                                                                             | 43111                                 | 2504          | 0             |               |
|                                   | 03042020-CSDp |                                                                             | 43531                                 | 2541          | 1             |               |
|                                   |               |                                                                             | <b>Average particles</b>              | <b>43479</b>  | <b>2539</b>   | <b>0</b>      |
|                                   |               |                                                                             | <b>% Filter collection efficiency</b> | <b>84.42%</b> | <b>97.50%</b> | <b>99.96%</b> |

|                                       |                                                                                                 |               |               |               |
|---------------------------------------|-------------------------------------------------------------------------------------------------|---------------|---------------|---------------|
| <b>Background Measurements #3</b>     | 12-05-2020 11:19:18                                                                             | 199179        | 53458         | 3000          |
|                                       | 12-05-2020 11:20:18                                                                             | 200037        | 54147         | 3313          |
|                                       | 12-05-2020 11:21:18                                                                             | 197918        | 52847         | 2976          |
|                                       | 12-05-2020 11:22:18                                                                             | 197892        | 52014         | 3034          |
| <b>Average</b>                        |                                                                                                 | <b>198757</b> | <b>53117</b>  | <b>3081</b>   |
| <b>Sample 21</b>                      | 12-05-2020 11:24:06 Triple layer Halyard QuickCheck H300                                        | 34132         | 582           | 4             |
|                                       | 12-05-2020 11:25:06 Sterilized: 1x, 121 degrees Celsius, 2 atm, 15 min                          | 34335         | 537           | 5             |
|                                       | 12-05-2020 11:26:06 <i>Background Measurements #3 used for calculation of filter efficiency</i> | 34000         | 587           | 1             |
|                                       | 12-05-2020 11:27:06                                                                             | 34727         | 555           | 1             |
| <b>Average</b>                        |                                                                                                 | <b>34299</b>  | <b>565</b>    | <b>3</b>      |
| <b>% Filter collection efficiency</b> |                                                                                                 | <b>82.74%</b> | <b>98.94%</b> | <b>99.91%</b> |
| <b>Sample 22</b>                      | 12-05-2020 11:29:04 Triple layer Halyard QuickCheck H300                                        | 32473         | 540           | 4             |
|                                       | 12-05-2020 11:30:04 Sterilized: 1x, 121 degrees Celsius, 2 atm, 15 min                          | 32532         | 518           | 0             |
|                                       | 12-05-2020 11:31:04 <i>Background Measurements #3 used for calculation of filter efficiency</i> | 32269         | 513           | 0             |
|                                       | 12-05-2020 11:32:04                                                                             | 32237         | 519           | 0             |
| <b>Average</b>                        |                                                                                                 | <b>32378</b>  | <b>523</b>    | <b>1</b>      |
| <b>% Filter collection efficiency</b> |                                                                                                 | <b>83.71%</b> | <b>99.02%</b> | <b>99.97%</b> |
| <b>Sample 23</b>                      | 12-05-2020 11:33:56 Triple layer Halyard QuickCheck H300                                        | 32294         | 552           | 0             |
|                                       | 12-05-2020 11:34:56 Sterilized: 1x, 121 degrees Celsius, 2 atm, 15 min                          | 32251         | 539           | 1             |
|                                       | 12-05-2020 11:35:56 <i>Background Measurements #3 used for calculation of filter efficiency</i> | 32426         | 545           | 0             |
|                                       | 12-05-2020 11:36:56                                                                             | 32066         | 523           | 0             |
| <b>Average</b>                        |                                                                                                 | <b>32259</b>  | <b>540</b>    | <b>0</b>      |
| <b>% Filter collection efficiency</b> |                                                                                                 | <b>83.77%</b> | <b>98.98%</b> | <b>99.99%</b> |
| <b>Sample 24</b>                      | 12-05-2020 11:38:54 Triple layer Halyard QuickCheck H300                                        | 32096         | 533           | 3             |
|                                       | 12-05-2020 11:39:54 Sterilized: 1x, 121 degrees Celsius, 2 atm, 15 min                          | 32039         | 577           | 0             |
|                                       | 12-05-2020 11:40:54 <i>Background Measurements #3 used for calculation of filter efficiency</i> | 32080         | 554           | 0             |
|                                       | 12-05-2020 11:41:54                                                                             | 31669         | 571           | 1             |
| <b>Average</b>                        |                                                                                                 | <b>31971</b>  | <b>559</b>    | <b>1</b>      |
| <b>% Filter efficiency</b>            |                                                                                                 | <b>83.91%</b> | <b>98.95%</b> | <b>99.97%</b> |

|                                       |                                                                                                 |               |               |               |
|---------------------------------------|-------------------------------------------------------------------------------------------------|---------------|---------------|---------------|
| <b>Background Measurements #4</b>     | 12-05-2020 11:43:19                                                                             | 199586        | 54589         | 3010          |
|                                       | 12-05-2020 11:44:19                                                                             | 201038        | 54950         | 3182          |
|                                       | 12-05-2020 11:45:19                                                                             | 203365        | 57330         | 3693          |
|                                       | 12-05-2020 11:46:19                                                                             | 203026        | 57191         | 3614          |
| <b>Average particles</b>              |                                                                                                 | <b>201754</b> | <b>56015</b>  | <b>3375</b>   |
| <b>Sample 25</b>                      | 12-05-2020 11:48:12 Triple layer Halyard QuickCheck H300                                        | 22113         | 285           | 1             |
|                                       | 12-05-2020 11:49:12 Sterilized: 2x, 121 degrees Celsius, 2 atm, 15 min                          | 22009         | 247           | 1             |
|                                       | 12-05-2020 11:50:12 <i>Background Measurements #4 used for calculation of filter efficiency</i> | 21980         | 280           | 1             |
|                                       | 12-05-2020 11:51:12                                                                             | 22038         | 259           | 1             |
| <b>Average particles</b>              |                                                                                                 | <b>22035</b>  | <b>268</b>    | <b>1</b>      |
| <b>% Filter collection efficiency</b> |                                                                                                 | <b>89.08%</b> | <b>99.52%</b> | <b>99.97%</b> |
| <b>Sample 26</b>                      | 12-05-2020 11:52:52 Triple layer Halyard QuickCheck H300                                        | 27234         | 397           | 0             |
|                                       | 12-05-2020 11:53:52 Sterilized: 2x, 121 degrees Celsius, 2 atm, 15 min                          | 26938         | 388           | 4             |
|                                       | 12-05-2020 11:54:52 <i>Background Measurements #4 used for calculation of filter efficiency</i> | 27226         | 451           | 3             |
|                                       | 12-05-2020 11:55:52                                                                             | 27383         | 429           | 2             |
| <b>Average particles</b>              |                                                                                                 | <b>27195</b>  | <b>416</b>    | <b>2</b>      |
| <b>% Filter collection efficiency</b> |                                                                                                 | <b>86.52%</b> | <b>99.26%</b> | <b>99.93%</b> |
| <b>Sample 27</b>                      | 12-05-2020 11:57:29 Triple layer Halyard QuickCheck H300                                        | 24091         | 286           | 2             |
|                                       | 12-05-2020 11:58:29 Sterilized: 2x, 121 degrees Celsius, 2 atm, 15 min                          | 24304         | 309           | 1             |
|                                       | 12-05-2020 11:59:29 <i>Background Measurements #4 used for calculation of filter efficiency</i> | 24523         | 363           | 1             |
|                                       | 12-05-2020 12:00:29                                                                             | 24132         | 344           | 0             |
| <b>Average particles</b>              |                                                                                                 | <b>24263</b>  | <b>326</b>    | <b>1</b>      |
| <b>% Filter collection efficiency</b> |                                                                                                 | <b>87.97%</b> | <b>99.42%</b> | <b>99.97%</b> |
| <b>Sample 28</b>                      | 12-05-2020 12:02:07 Triple layer Halyard QuickCheck H300                                        | 27458         | 393           | 3             |
|                                       | 12-05-2020 12:03:07 Sterilized: 2x, 121 degrees Celsius, 2 atm, 15 min                          | 26972         | 377           | 2             |
|                                       | 12-05-2020 12:04:07 <i>Background Measurements #4 used for calculation of filter efficiency</i> | 27180         | 369           | 0             |
|                                       | 12-05-2020 12:05:07                                                                             | 27284         | 409           | 0             |
| <b>Average particles</b>              |                                                                                                 | <b>27224</b>  | <b>387</b>    | <b>1</b>      |
| <b>% Filter collection efficiency</b> |                                                                                                 | <b>86.51%</b> | <b>99.31%</b> | <b>99.96%</b> |

|                                       |                                                                                                 |               |               |               |
|---------------------------------------|-------------------------------------------------------------------------------------------------|---------------|---------------|---------------|
| <b>Background Measurements #5</b>     | 12-05-2020 12:06:30                                                                             | 203253        | 59450         | 3682          |
|                                       | 12-05-2020 12:07:30                                                                             | 203574        | 60303         | 4160          |
|                                       | 12-05-2020 12:08:30                                                                             | 202157        | 59967         | 4002          |
|                                       | 12-05-2020 12:09:30                                                                             | 203039        | 60223         | 3970          |
| <b>Average particles</b>              |                                                                                                 | <b>203006</b> | <b>59986</b>  | <b>3954</b>   |
| <b>Sample 29</b>                      | 12-05-2020 12:10:58 Triple layer Halyard QuickCheck H300                                        | 36750         | 774           | 2             |
|                                       | 12-05-2020 12:11:58 Sterilized: 3x, 121 degrees Celsius, 2 atm, 15 min                          | 37271         | 743           | 2             |
|                                       | 12-05-2020 12:12:58 <i>Background Measurements #5 used for calculation of filter efficiency</i> | 37511         | 752           | 0             |
|                                       | 12-05-2020 12:13:58                                                                             | 36993         | 748           | 0             |
| <b>Average particles</b>              |                                                                                                 | <b>37131</b>  | <b>754</b>    | <b>1</b>      |
| <b>% Filter collection efficiency</b> |                                                                                                 | <b>81.71%</b> | <b>98.74%</b> | <b>99.97%</b> |
| <b>Sample 30</b>                      | 12-05-2020 12:15:43 Triple layer Halyard QuickCheck H300                                        | 34559         | 682           | 11            |
|                                       | 12-05-2020 12:16:43 Sterilized: 3x, 121 degrees Celsius, 2 atm, 15 min                          | 34648         | 596           | 0             |
|                                       | 12-05-2020 12:17:43 <i>Background Measurements #5 used for calculation of filter efficiency</i> | 34888         | 634           | 2             |
|                                       | 12-05-2020 12:18:43                                                                             | 34920         | 629           | 0             |
| <b>Average particles</b>              |                                                                                                 | <b>34754</b>  | <b>635</b>    | <b>3</b>      |
| <b>% Filter collection efficiency</b> |                                                                                                 | <b>82.88%</b> | <b>98.94%</b> | <b>99.92%</b> |
| <b>Sample 31</b>                      | 12-05-2020 12:20:37 Triple layer Halyard QuickCheck H300                                        | 33308         | 604           | 1             |
|                                       | 12-05-2020 12:21:37 Sterilized: 3x, 121 degrees Celsius, 2 atm, 15 min                          | 33013         | 560           | 1             |
|                                       | 12-05-2020 12:22:37 <i>Background Measurements #5 used for calculation of filter efficiency</i> | 33233         | 605           | 2             |
|                                       | 12-05-2020 12:23:37                                                                             | 33137         | 618           | 0             |
| <b>Average particles</b>              |                                                                                                 | <b>33173</b>  | <b>597</b>    | <b>1</b>      |
| <b>% Filter collection efficiency</b> |                                                                                                 | <b>83.66%</b> | <b>99.01%</b> | <b>99.97%</b> |
| <b>Sample 32</b>                      | 12-05-2020 12:25:10 Triple layer Halyard QuickCheck H300                                        | 36298         | 683           | 0             |
|                                       | 12-05-2020 12:26:10 Sterilized: 3x, 121 degrees Celsius, 2 atm, 15 min                          | 36499         | 707           | 0             |
|                                       | 12-05-2020 12:27:10 <i>Background Measurements #5 used for calculation of filter efficiency</i> | 36445         | 699           | 1             |
|                                       | 12-05-2020 12:28:10                                                                             | 36351         | 788           | 0             |
| <b>Average particles</b>              |                                                                                                 | <b>36398</b>  | <b>719</b>    | <b>0</b>      |
| <b>% Filter collection efficiency</b> |                                                                                                 | <b>82.07%</b> | <b>98.80%</b> | <b>99.99%</b> |



|                                       |                                                                                                 |               |               |               |
|---------------------------------------|-------------------------------------------------------------------------------------------------|---------------|---------------|---------------|
| <b>Background Measurements #6</b>     | 12-05-2020 12:29:33                                                                             | 201424        | 60674         | 4051          |
|                                       | 12-05-2020 12:30:33                                                                             | 201432        | 60566         | 4109          |
|                                       | 12-05-2020 12:31:33                                                                             | 202001        | 60854         | 4089          |
|                                       | 12-05-2020 12:32:33                                                                             | 198776        | 59439         | 3744          |
| <b>Average particles</b>              |                                                                                                 | <b>200908</b> | <b>60383</b>  | <b>3998</b>   |
| <b>Sample 33</b>                      | 12-05-2020 12:34:01 Triple layer Halyard QuickCheck H300                                        | 28241         | 461           | 3             |
|                                       | 12-05-2020 12:35:01 Sterilized: 4x, 121 degrees Celsius, 2 atm, 15 min                          | 28206         | 423           | 0             |
|                                       | 12-05-2020 12:36:01 <i>Background Measurements #6 used for calculation of filter efficiency</i> | 28117         | 445           | 3             |
|                                       | 12-05-2020 12:37:01                                                                             | 27944         | 445           | 1             |
| <b>Average particles</b>              |                                                                                                 | <b>28127</b>  | <b>444</b>    | <b>2</b>      |
| <b>% Filter collection efficiency</b> |                                                                                                 | <b>86.00%</b> | <b>99.27%</b> | <b>99.96%</b> |
| <b>Sample 34</b>                      | 12-05-2020 12:38:38 Triple layer Halyard QuickCheck H300                                        | 27216         | 408           | 2             |
|                                       | 12-05-2020 12:39:38 Sterilized: 4x, 121 degrees Celsius, 2 atm, 15 min                          | 27672         | 469           | 9             |
|                                       | 12-05-2020 12:40:38 <i>Background Measurements #6 used for calculation of filter efficiency</i> | 27168         | 417           | 0             |
|                                       | 12-05-2020 12:41:38                                                                             | 27544         | 429           | 5             |
| <b>Average particles</b>              |                                                                                                 | <b>27400</b>  | <b>431</b>    | <b>4</b>      |
| <b>% Filter collection efficiency</b> |                                                                                                 | <b>86.36%</b> | <b>99.29%</b> | <b>99.90%</b> |
| <b>Sample 35</b>                      | 12-05-2020 12:43:11 Triple layer Halyard QuickCheck H300                                        | 29020         | 487           | 2             |
|                                       | 12-05-2020 12:44:11 Sterilized: 4x, 121 degrees Celsius, 2 atm, 15 min                          | 29331         | 483           | 3             |
|                                       | 12-05-2020 12:45:11 <i>Background Measurements #6 used for calculation of filter efficiency</i> | 28752         | 470           | 0             |
|                                       | 12-05-2020 12:46:11                                                                             | 28601         | 463           | 0             |
| <b>Average particles</b>              |                                                                                                 | <b>28926</b>  | <b>476</b>    | <b>1</b>      |
| <b>% Filter collection efficiency</b> |                                                                                                 | <b>85.60%</b> | <b>99.21%</b> | <b>99.97%</b> |
| <b>Sample 36</b>                      | 12-05-2020 12:47:49 Triple layer Halyard QuickCheck H300                                        | 29645         | 521           | 10            |
|                                       | 12-05-2020 12:48:49 Sterilized: 4x, 121 degrees Celsius, 2 atm, 15 min                          | 29461         | 496           | 0             |
|                                       | 12-05-2020 12:49:49 <i>Background Measurements #6 used for calculation of filter efficiency</i> | 29765         | 514           | 1             |
|                                       | 12-05-2020 12:50:49                                                                             | 29472         | 484           | 1             |
| <b>Average particles</b>              |                                                                                                 | <b>29586</b>  | <b>504</b>    | <b>3</b>      |
| <b>% Filter collection efficiency</b> |                                                                                                 | <b>85.27%</b> | <b>99.17%</b> | <b>99.92%</b> |

|                                       |                                                                                                 |               |               |               |
|---------------------------------------|-------------------------------------------------------------------------------------------------|---------------|---------------|---------------|
| <b>Background Measurements #7</b>     | 12-05-2020 12:52:20                                                                             | 193547        | 57697         | 3775          |
|                                       | 12-05-2020 12:53:20                                                                             | 195559        | 58490         | 3808          |
|                                       | 12-05-2020 12:54:20                                                                             | 195140        | 58454         | 3796          |
|                                       | 12-05-2020 12:55:20                                                                             | 195848        | 59217         | 3953          |
| <b>Average particles</b>              |                                                                                                 | <b>195024</b> | <b>58465</b>  | <b>3833</b>   |
| <b>Sample 37</b>                      | 12-05-2020 12:56:49 Triple layer Halyard QuickCheck H300                                        | 31897         | 582           | 2             |
|                                       | 12-05-2020 12:57:49 Sterilized: 5x, 121 degrees Celsius, 2 atm, 15 min                          | 32117         | 623           | 3             |
|                                       | 12-05-2020 12:58:49 <i>Background Measurements #7 used for calculation of filter efficiency</i> | 32102         | 589           | 2             |
|                                       | 12-05-2020 12:59:49                                                                             | 31754         | 553           | 0             |
| <b>Average particles</b>              |                                                                                                 | <b>31968</b>  | <b>587</b>    | <b>2</b>      |
| <b>% Filter collection efficiency</b> |                                                                                                 | <b>83.61%</b> | <b>99.00%</b> | <b>99.95%</b> |
| <b>Sample 38</b>                      | 12-05-2020 13:01:21 Triple layer Halyard QuickCheck H300                                        | 29977         | 494           | 0             |
|                                       | 12-05-2020 13:02:21 Sterilized: 5x, 121 degrees Celsius, 2 atm, 15 min                          | 29600         | 460           | 0             |
|                                       | 12-05-2020 13:03:21 <i>Background Measurements #7 used for calculation of filter efficiency</i> | 29845         | 543           | 2             |
|                                       | 12-05-2020 13:04:21                                                                             | 29843         | 474           | 1             |
| <b>Average particles</b>              |                                                                                                 | <b>29816</b>  | <b>493</b>    | <b>1</b>      |
| <b>% Filter collection efficiency</b> |                                                                                                 | <b>84.71%</b> | <b>99.16%</b> | <b>99.98%</b> |
| <b>Sample 39</b>                      | 12-05-2020 13:05:56 Triple layer Halyard QuickCheck H300                                        | 32389         | 559           | 4             |
|                                       | 12-05-2020 13:06:56 Sterilized: 5x, 121 degrees Celsius, 2 atm, 15 min                          | 32570         | 620           | 0             |
|                                       | 12-05-2020 13:07:56 <i>Background Measurements #7 used for calculation of filter efficiency</i> | 33131         | 643           | 1             |
|                                       | 12-05-2020 13:08:56                                                                             | 33075         | 572           | 1             |
| <b>Average particles</b>              |                                                                                                 | <b>32791</b>  | <b>599</b>    | <b>2</b>      |
| <b>% Filter collection efficiency</b> |                                                                                                 | <b>83.19%</b> | <b>98.98%</b> | <b>99.96%</b> |
| <b>Sample 40</b>                      | 12-05-2020 13:10:35 Triple layer Halyard QuickCheck H300                                        | 34261         | 659           | 0             |
|                                       | 12-05-2020 13:11:35 Sterilized: 5x, 121 degrees Celsius, 2 atm, 15 min                          | 34125         | 650           | 0             |
|                                       | 12-05-2020 13:12:35 <i>Background Measurements #7 used for calculation of filter efficiency</i> | 34417         | 627           | 1             |
|                                       | 12-05-2020 13:13:35                                                                             | 34357         | 680           | 1             |
| <b>Average particles</b>              |                                                                                                 | <b>34290</b>  | <b>654</b>    | <b>1</b>      |
| <b>% Filter collection efficiency</b> |                                                                                                 | <b>82.42%</b> | <b>98.88%</b> | <b>99.99%</b> |

| <b>Background Measurements #8</b> |                                                                            | <b>234853</b> | <b>36280</b>  | <b>1157</b>    |
|-----------------------------------|----------------------------------------------------------------------------|---------------|---------------|----------------|
| <b>Sample 41</b>                  | Surgical Mask                                                              | 103596        | 3897          | 12             |
| <b>Sample 42</b>                  | <i>Background Measurement #8 used for calculation of filter efficiency</i> | 113947        | 4545          | 23             |
| <b>Sample 43</b>                  |                                                                            | 99473         | 3680          | 6              |
| <b>Sample 44</b>                  |                                                                            | 110228        | 4412          | 9              |
|                                   | <b>Average</b>                                                             | <b>106811</b> | <b>4133.5</b> | <b>12.5</b>    |
|                                   | <b>Filter efficiency</b>                                                   | <b>54.52%</b> | <b>88.61%</b> | <b>98.92%</b>  |
|                                   | <b>Filter efficiency Std. Dev.</b>                                         | <b>2.77%</b>  | <b>1.13%</b>  | <b>0.64%</b>   |
| <b>Sample 45</b>                  | Disposable Face Mask FFP2                                                  | 15138         | 175           | 0              |
| <b>Sample 46</b>                  | <i>Background Measurement #8 used for calculation of filter efficiency</i> | 14251         | 154           | 0              |
| <b>Sample 47</b>                  |                                                                            | 13265         | 142           | 0              |
| <b>Sample 48</b>                  |                                                                            | 12986         | 155           | 0              |
|                                   | <b>Average</b>                                                             | <b>13910</b>  | <b>156.5</b>  | <b>0</b>       |
|                                   | <b>Filter efficiency</b>                                                   | <b>94.08%</b> | <b>99.57%</b> | <b>100.00%</b> |
|                                   | <b>Filter efficiency Std. Dev.</b>                                         | <b>0.42%</b>  | <b>0.04%</b>  | <b>0.00%</b>   |
| <b>Sample 49</b>                  | 3M 8320 FFP2 NR D Mask                                                     | 2550          | 35            | 1              |
| <b>Sample 50</b>                  | <i>Background Measurement #8 used for calculation of filter efficiency</i> | 9606          | 128           | 0              |
| <b>Sample 51</b>                  |                                                                            | 4465          | 79            | 0              |
| <b>Sample 52</b>                  |                                                                            | 7419          | 127           | 2              |
|                                   | <b>Average</b>                                                             | <b>6010</b>   | <b>92.25</b>  | <b>0.75</b>    |
|                                   | <b>Filter efficiency</b>                                                   | <b>97.44%</b> | <b>99.75%</b> | <b>99.94%</b>  |
|                                   | <b>Filter efficiency Std. Dev.</b>                                         | <b>1.33%</b>  | <b>0.12%</b>  | <b>0.08%</b>   |
