# Supplementary material for: Using surgical wrapping material for the fabrication of respirator masks
Source: PubMed Central journal article supplement (PMC7373262; doi:10.1371/journal.pone.0236239), 2020-07-21
Supplement: pone.0236239.s003.pdf [file pone.0236239.s003.pdf]

|                                                                 |                             |            |           |        |        |       |          |          |
|-----------------------------------------------------------------|-----------------------------|------------|-----------|--------|--------|-------|----------|----------|
|                                                                 | Sample P24                  | 20/5/2020  | 16.1      | 1578.9 | 179.42 | 192.8 | 12.6     |          |
| Triple layer, 2x sterilized                                     | Sample P25                  | 20/5/2020  | 17.5      | 1716.2 | 195.02 |       |          |          |
|                                                                 | Sample P26                  | 20/5/2020  | 15.2      | 1490.6 | 169.39 |       |          |          |
|                                                                 | Sample P27                  | 20/5/2020  | 16.4      | 1608.3 | 182.76 | $\mu$ | $\sigma$ |          |
|                                                                 | Sample P28                  | 20/5/2020  | 16.1      | 1578.9 | 179.42 | 181.6 | 10.6     |          |
| Triple layer, 3x sterilized                                     | Sample P29                  | 20/5/2020  | 15.9      | 1559.3 | 177.19 |       |          |          |
|                                                                 | Sample P30                  | 20/5/2020  | 16.6      | 1627.9 | 184.99 |       |          |          |
|                                                                 | Sample P31                  | 20/5/2020  | 16.3      | 1598.5 | 181.65 | $\mu$ | $\sigma$ |          |
|                                                                 | Sample P32                  | 20/5/2020  | 16.9      | 1657.3 | 188.33 | 183.0 | 4.8      |          |
| Triple layer, 4x sterilized                                     | Sample P33                  | 20/5/2020  | 15.7      | 1539.6 | 174.96 |       |          |          |
|                                                                 | Sample P34                  | 20/5/2020  | 16.1      | 1578.9 | 179.42 |       |          |          |
|                                                                 | Sample P35                  | 20/5/2020  | 16.2      | 1588.7 | 180.53 | $\mu$ | $\sigma$ |          |
|                                                                 | Sample P36                  | 20/5/2020  | 15.6      | 1529.8 | 173.85 | 177.2 | 3.3      |          |
| Triple layer, 5x sterilized                                     | Sample P37                  | 20/5/2020  | 14.7      | 1441.6 | 163.82 |       |          |          |
|                                                                 | Sample P38                  | 20/5/2020  | 16.2      | 1588.7 | 180.53 |       |          |          |
|                                                                 | Sample P39                  | 20/5/2020  | 15.6      | 1529.8 | 173.85 | $\mu$ | $\sigma$ |          |
|                                                                 | Sample P40                  | 20/5/2020  | 15.7      | 1539.6 | 174.96 | 173.3 | 7.0      |          |
| <b>Comparison with commercial<br/>Masks &amp; Respirators</b>   | Surgical Mask               | Sample P41 | 20/5/2020 | 3.7    | 362.8  | 41.23 |          |          |
|                                                                 | Ghor-1105-3                 | Sample P42 | 20/5/2020 | 3.3    | 323.6  | 36.77 |          |          |
|                                                                 | Henan Gore Medical Instrume | Sample P43 | 20/5/2020 | 3.5    | 343.2  | 39.00 | $\mu$    | $\sigma$ |
|                                                                 |                             | Sample P44 | 20/5/2020 | 3.2    | 313.8  | 35.66 | 38.2     | 2.5      |
| Disposable Face Mask FFP2<br>EN149:2001+A1: 2009<br>GHOR-1105-5 | Sample P45                  | 20/5/2020  | 8.6       | 843.4  | 95.84  |       |          |          |
|                                                                 | Sample P46                  | 20/5/2020  | 8.8       | 863.0  | 98.07  |       |          |          |
|                                                                 | Sample P47                  | 20/5/2020  | 8.9       | 872.8  | 99.18  | $\mu$ | $\sigma$ |          |
|                                                                 | Sample P48                  | 20/5/2020  | 9.1       | 892.4  | 101.41 | 98.6  | 2.3      |          |

|                   |            |           |     |       |       |                                 |                                   |
|-------------------|------------|-----------|-----|-------|-------|---------------------------------|-----------------------------------|
| 3M 8320 FFP2 NR D | Sample P49 | 20/5/2020 | 6.6 | 647.2 | 73.55 | <b><math>\mu</math></b><br>65.7 | <b><math>\sigma</math></b><br>6.9 |
|                   | Sample P50 | 20/5/2020 | 6.2 | 608.0 | 69.09 |                                 |                                   |
|                   | Sample P51 | 20/5/2020 | 5.2 | 509.9 | 57.95 |                                 |                                   |
|                   | Sample P52 | 20/5/2020 | 5.6 | 549.2 | 62.41 |                                 |                                   |
