# Supplementary material for: Using surgical wrapping material for the fabrication of respirator masks
Source: PubMed Central journal article supplement (PMC7373262; doi:10.1371/journal.pone.0236239), 2020-07-21
Supplement: pone.0236239.s004.pdf [file pone.0236239.s004.pdf]

## Water column pressure test

|                                      |                  |             |            | cm H2O |          |          |
|--------------------------------------|------------------|-------------|------------|--------|----------|----------|
| Unsterilised material (from package) | White Layer only | Sample PT52 | 20/05/2020 | 55     |          |          |
|                                      |                  | Sample PT53 | 20/05/2020 | 49     |          |          |
|                                      |                  | Sample PT54 | 20/05/2020 | 52     | $\mu$    | $\sigma$ |
|                                      |                  | Sample PT55 | 20/05/2020 | 46     | 50.5     | 3.9      |
|                                      | Blue layer only  | Sample PT56 | 20/05/2020 | 86     |          |          |
|                                      |                  | Sample PT57 | 20/05/2020 | 92     |          |          |
|                                      |                  | Sample PT58 | 20/05/2020 | 82     | $\mu$    | $\sigma$ |
|                                      |                  | Sample PT59 | 20/05/2020 | 81     | 85.3     | 5.0      |
| Single Layer                         | Sample PT1       | 3/4/2020    | 95         |        |          |          |
|                                      | Sample PT2       | 3/4/2020    | 85         |        |          |          |
|                                      | Sample PT3       | 3/4/2020    | 85         | $\mu$  | $\sigma$ |          |
|                                      | Sample PT60      | 20/05/2020  | 79         | 86.0   | 6.6      |          |
| Double Layer                         | Sample PT4       | 3/4/2020    | 95         |        |          |          |
|                                      | Sample PT5       | 3/4/2020    | 90         |        |          |          |
|                                      | Sample PT6       | 3/4/2020    | 90         | $\mu$  | $\sigma$ |          |
|                                      | Sample PT61      | 20/05/2020  | 94         | 92.3   | 2.6      |          |
| Double Layer, Reversed               | Sample PT62      | 20/05/2020  | 92         |        |          |          |
|                                      | Sample PT63      | 20/05/2020  | 92         |        |          |          |
|                                      | Sample PT64      | 20/05/2020  | 94         | $\mu$  | $\sigma$ |          |
|                                      | Sample PT65      | 20/05/2020  | 96         | 93.5   | 1.9      |          |
| Triple Layer                         | Sample PT7       | 3/4/2020    | 95         |        |          |          |
|                                      | Sample PT8       | 3/4/2020    | 115        |        |          |          |
|                                      | Sample PT9       | 3/4/2020    | 105        |        |          |          |

|             |            |     |       |          |
|-------------|------------|-----|-------|----------|
| Sample PT16 | 12/5/2020  | 102 |       |          |
| Sample PT17 | 12/5/2020  | 93  |       |          |
| Sample PT18 | 12/5/2020  | 94  |       |          |
| Sample PT19 | 12/5/2020  | 90  |       |          |
| Sample PT66 | 20/05/2020 | 91  |       |          |
| Sample PT67 | 20/05/2020 | 106 |       |          |
| Sample PT68 | 20/05/2020 | 94  | $\mu$ | $\sigma$ |
| Sample PT69 | 20/05/2020 | 96  | 98.3  | 7.7      |

**Steam Sterilised (15min, 121 degrees Celsius, 2 atm)**

|                             |             |            |    |       |          |
|-----------------------------|-------------|------------|----|-------|----------|
| Single Layer, 1x Sterilized | Sample PT10 | 3/4/2020   | 80 |       |          |
|                             | Sample PT11 | 3/4/2020   | 80 |       |          |
|                             | Sample PT70 | 20/05/2020 | 77 | $\mu$ | $\sigma$ |
|                             | Sample PT71 | 20/05/2020 | 81 | 79.5  | 1.7      |

|                             |             |            |    |       |          |
|-----------------------------|-------------|------------|----|-------|----------|
| Double Layer, 1x Sterilized | Sample PT12 | 3/4/2020   | 90 |       |          |
|                             | Sample PT13 | 3/4/2020   | 90 |       |          |
|                             | Sample PT72 | 20/05/2020 | 88 | $\mu$ | $\sigma$ |
|                             | Sample PT73 | 20/05/2020 | 87 | 88.8  | 1.5      |

|                             |             |           |     |       |          |
|-----------------------------|-------------|-----------|-----|-------|----------|
| Triple Layer, 1x Sterilized | Sample PT14 | 3/4/2020  | 100 |       |          |
|                             | Sample PT15 | 3/4/2020  | 100 |       |          |
|                             | Sample PT20 | 12/5/2020 | 98  |       |          |
|                             | Sample PT21 | 12/5/2020 | 93  |       |          |
|                             | Sample PT22 | 12/5/2020 | 94  | $\mu$ | $\sigma$ |
|                             | Sample PT23 | 12/5/2020 | 92  | 96.2  | 3.6      |

|                             |             |           |     |       |          |
|-----------------------------|-------------|-----------|-----|-------|----------|
| Triple Layer, 2x Sterilized | Sample PT24 | 12/5/2020 | 101 |       |          |
|                             | Sample PT25 | 12/5/2020 | 99  |       |          |
|                             | Sample PT26 | 12/5/2020 | 104 | $\mu$ | $\sigma$ |
|                             | Sample PT27 | 12/5/2020 | 99  | 100.8 | 2.4      |

|                             |             |           |    |       |          |
|-----------------------------|-------------|-----------|----|-------|----------|
| Triple Layer, 3x Sterilized | Sample PT28 | 12/5/2020 | 90 | $\mu$ | $\sigma$ |
|                             | Sample PT29 | 12/5/2020 | 95 |       |          |
|                             | Sample PT30 | 12/5/2020 | 93 |       |          |
|                             | Sample PT31 | 12/5/2020 | 92 |       |          |

|                             |             |           |     |       |          |
|-----------------------------|-------------|-----------|-----|-------|----------|
| Triple Layer, 4x Sterilized | Sample PT32 | 12/5/2020 | 99  | $\mu$ | $\sigma$ |
|                             | Sample PT33 | 12/5/2020 | 103 |       |          |
|                             | Sample PT34 | 12/5/2020 | 106 |       |          |
|                             | Sample PT35 | 12/5/2020 | 104 |       |          |

|                             |             |           |    |       |          |
|-----------------------------|-------------|-----------|----|-------|----------|
| Triple Layer, 5x Sterilized | Sample PT36 | 12/5/2020 | 94 | $\mu$ | $\sigma$ |
|                             | Sample PT37 | 12/5/2020 | 97 |       |          |
|                             | Sample PT38 | 12/5/2020 | 95 |       |          |
|                             | Sample PT39 | 12/5/2020 | 93 |       |          |

**Comparison with commercial Masks & Respirators**

|               |             |            |    |       |          |
|---------------|-------------|------------|----|-------|----------|
| Surgical Mask | Sample PT40 | 20/05/2020 | 62 | $\mu$ | $\sigma$ |
|               | Sample PT41 | 20/05/2020 | 67 |       |          |
|               | Sample PT42 | 20/05/2020 | 64 |       |          |
|               | Sample PT43 | 20/05/2020 | 69 |       |          |

|                           |             |            |    |       |          |
|---------------------------|-------------|------------|----|-------|----------|
| Disposable Face Mask FFP2 | Sample PT44 | 20/05/2020 | 96 | $\mu$ | $\sigma$ |
|                           | Sample PT45 | 20/05/2020 | 89 |       |          |
|                           | Sample PT46 | 20/05/2020 | 92 |       |          |
|                           | Sample PT47 | 20/05/2020 | 93 |       |          |

|                   |             |            |    |       |          |
|-------------------|-------------|------------|----|-------|----------|
| 3M 8320 FFP2 NR D | Sample PT48 | 20/05/2020 | 56 | $\mu$ | $\sigma$ |
|                   | Sample PT49 | 20/05/2020 | 61 |       |          |
|                   | Sample PT50 | 20/05/2020 | 53 |       |          |
|                   | Sample PT51 | 20/05/2020 | 51 |       |          |
