# Supplementary material for: Using surgical wrapping material for the fabrication of respirator masks
Source: PubMed Central journal article supplement (PMC7373262; doi:10.1371/journal.pone.0236239), 2020-07-21
Supplement: pone.0236239.s005.pdf [file pone.0236239.s005.pdf]

## Filter Efficiency Test H500

|                               |                                  |            | 0.3um         | 0.5um         | 3.0um         |
|-------------------------------|----------------------------------|------------|---------------|---------------|---------------|
| <b>White Layer Only, H500</b> | Sample H500-13                   | 28/05/2020 | 71.46%        | 91.02%        | 99.47%        |
|                               | Sample H500-14                   | 28/05/2020 | 67.20%        | 88.31%        | 99.19%        |
|                               | Sample H500-15                   | 28/05/2020 | 67.16%        | 88.19%        | 98.87%        |
|                               | Sample H500-16                   | 28/05/2020 | 74.31%        | 92.88%        | 99.41%        |
|                               | <b>Averaged</b>                  |            | <b>70.03%</b> | <b>90.10%</b> | <b>99.23%</b> |
|                               | <b>Intersample Standard Dev.</b> |            | <b>3.49%</b>  | <b>2.27%</b>  | <b>0.27%</b>  |
| <b>Blue layer Only, H500</b>  | Sample H500-17                   | 28/05/2020 | 69.12%        | 89.05%        | 99.20%        |
|                               | Sample H500-18                   | 28/05/2020 | 71.02%        | 90.43%        | 99.40%        |
|                               | Sample H500-19                   | 28/05/2020 | 70.16%        | 89.53%        | 99.45%        |
|                               | Sample H500-20                   | 28/05/2020 | 70.71%        | 89.72%        | 99.32%        |
|                               | <b>Averaged</b>                  |            | <b>70.25%</b> | <b>89.68%</b> | <b>99.34%</b> |
|                               | <b>Intersample Standard Dev.</b> |            | <b>0.84%</b>  | <b>0.57%</b>  | <b>0.11%</b>  |
| <b>Single layer, H500</b>     | Sample H500-1                    | 28/05/2020 | 87.63%        | 98.33%        | 99.89%        |
|                               | Sample H500-2                    | 28/05/2020 | 86.40%        | 97.95%        | 99.96%        |
|                               | Sample H500-3                    | 28/05/2020 | 85.67%        | 97.61%        | 99.98%        |
|                               | Sample H500-4                    | 28/05/2020 | 86.86%        | 98.01%        | 99.96%        |
|                               | <b>Averaged</b>                  |            | <b>86.64%</b> | <b>97.98%</b> | <b>99.95%</b> |
|                               | <b>Intersample Standard Dev.</b> |            | <b>0.82%</b>  | <b>0.30%</b>  | <b>0.04%</b>  |
| <b>Double Layer, H500</b>     | Sample H500-5                    | 28/05/2020 | 97.08%        | 99.86%        | 99.97%        |
|                               | Sample H500-6                    | 28/05/2020 | 96.00%        | 99.76%        | 99.97%        |
|                               | Sample H500-7                    | 28/05/2020 | 96.48%        | 99.79%        | 99.97%        |
|                               | Sample H500-8                    | 28/05/2020 | 97.46%        | 99.88%        | 99.98%        |
|                               | <b>Averaged</b>                  |            | <b>96.75%</b> | <b>99.82%</b> | <b>99.97%</b> |
|                               | <b>Intersample Standard Dev.</b> |            | <b>0.65%</b>  | <b>0.06%</b>  | <b>0.01%</b>  |

|                                  |                |            |               |               |               |
|----------------------------------|----------------|------------|---------------|---------------|---------------|
| <b>Triple Layer, H500</b>        | Sample H500-9  | 28/05/2020 | 99.22%        | 99.92%        | 99.75%        |
|                                  | Sample H500-10 | 28/05/2020 | 99.01%        | 99.97%        | 99.99%        |
|                                  | Sample H500-11 | 28/05/2020 | 99.31%        | 99.98%        | 99.99%        |
|                                  | Sample H500-12 | 28/05/2020 | 99.14%        | 99.97%        | 99.98%        |
| <b>Averaged</b>                  |                |            | <b>99.17%</b> | <b>99.96%</b> | <b>99.93%</b> |
| <b>Intersample Standard Dev.</b> |                |            | <b>0.13%</b>  | <b>0.03%</b>  | <b>0.12%</b>  |

## Filter Efficiency Test H500 (per sample)

|                    |                                       |                          | 0,3µm         | 0,5µm         | 3,0µm       |
|--------------------|---------------------------------------|--------------------------|---------------|---------------|-------------|
| Single Layer, H500 | Background measurement                | 28-05-2020 16:26:37      | 233933        | 86142         | 1945        |
|                    |                                       | 28-05-2020 16:27:37      | 227428        | 81748         | 1407        |
|                    |                                       | 28-05-2020 16:28:37      | 226702        | 82269         | 1277        |
|                    |                                       | 28-05-2020 16:29:37      | 226390        | 81695         | 1545        |
|                    |                                       | 28-05-2020 16:41:34      | 222989        | 81879         | 1333        |
|                    |                                       | 28-05-2020 16:42:34      | 223266        | 82389         | 1316        |
|                    |                                       | 28-05-2020 16:43:34      | 223463        | 82193         | 1257        |
|                    |                                       | 28-05-2020 16:44:34      | 221485        | 81769         | 1240        |
|                    |                                       | <b>Average particles</b> | <b>225707</b> | <b>82511</b>  | <b>1415</b> |
| Sample H500-1      |                                       | 28-05-2020 16:47:15      | 27852         | 1335          | 0           |
|                    |                                       | 28-05-2020 16:48:15      | 28133         | 1409          | 3           |
|                    |                                       | 28-05-2020 16:49:15      | 27904         | 1358          | 2           |
|                    |                                       | 28-05-2020 16:50:15      | 27768         | 1400          | 1           |
|                    |                                       | <b>Average particles</b> | <b>27914</b>  | <b>1376</b>   | <b>2</b>    |
|                    | <b>% Filter collection efficiency</b> | <b>87.63%</b>            | <b>98.33%</b> | <b>99.89%</b> |             |
| Sample H500-2      |                                       | 28-05-2020 16:51:46      | 30717         | 1731          | 1           |
|                    |                                       | 28-05-2020 16:52:46      | 31082         | 1699          | 1           |
|                    |                                       | 28-05-2020 16:53:46      | 30553         | 1647          | 0           |
|                    |                                       | 28-05-2020 16:54:46      | 30391         | 1676          | 0           |
|                    |                                       | <b>Average particles</b> | <b>30686</b>  | <b>1688</b>   | <b>1</b>    |
|                    | <b>% Filter collection efficiency</b> | <b>86.40%</b>            | <b>97.95%</b> | <b>99.96%</b> |             |
| Sample H500-3      |                                       | 28-05-2020 16:56:30      | 32489         | 1937          | 0           |
|                    |                                       | 28-05-2020 16:57:30      | 31733         | 1876          | 0           |
|                    |                                       | 28-05-2020 16:58:30      | 32685         | 2062          | 1           |
|                    |                                       | 28-05-2020 16:59:30      | 32478         | 2017          | 0           |

**Average particles**    **32346**    **1973**    **0**  
**% Filter collection efficiency**    **85.67%**    **97.61%**    **99.98%**

|               |                     |       |      |   |
|---------------|---------------------|-------|------|---|
| Sample H500-4 | 28-05-2020 17:01:02 | 30015 | 1705 | 1 |
|               | 28-05-2020 17:02:02 | 29961 | 1631 | 1 |
|               | 28-05-2020 17:03:02 | 29302 | 1648 | 0 |
|               | 28-05-2020 17:04:02 | 29320 | 1573 | 0 |

**Average particles**    **29650**    **1639**    **1**  
**% Filter collection efficiency**    **86.86%**    **98.01%**    **99.96%**

|                        |                     |        |       |      |
|------------------------|---------------------|--------|-------|------|
| Background measurement | 28-05-2020 17:05:52 | 220648 | 85968 | 1622 |
|                        | 28-05-2020 17:06:52 | 217750 | 84829 | 1532 |
|                        | 28-05-2020 17:07:52 | 217294 | 84608 | 1558 |
|                        | 28-05-2020 17:08:52 | 216690 | 85108 | 1732 |

**Average particles**    **218096**    **85128**    **1611**

**Double Layer H500**

|               |                     |      |     |   |
|---------------|---------------------|------|-----|---|
| Sample H500-5 | 28-05-2020 17:10:47 | 6325 | 134 | 0 |
|               | 28-05-2020 17:11:47 | 6286 | 117 | 0 |
|               | 28-05-2020 17:12:47 | 6379 | 93  | 1 |
|               | 28-05-2020 17:13:47 | 6445 | 133 | 1 |

**Average particles**    **6359**    **119**    **1**  
**% Filter collection efficiency**    **97.08%**    **99.86%**    **99.97%**

|               |                     |      |     |   |
|---------------|---------------------|------|-----|---|
| Sample H500-6 | 28-05-2020 17:16:22 | 8736 | 172 | 1 |
|               | 28-05-2020 17:17:22 | 8742 | 201 | 0 |
|               | 28-05-2020 17:18:22 | 8713 | 242 | 0 |
|               | 28-05-2020 17:19:22 | 8711 | 205 | 1 |

**Average particles**    **8726**    **205**    **1**  
**% Filter collection efficiency**    **96.00%**    **99.76%**    **99.97%**

|               |                     |      |     |   |
|---------------|---------------------|------|-----|---|
| Sample H500-7 | 28-05-2020 17:21:18 | 7780 | 177 | 0 |
|               | 28-05-2020 17:22:18 | 7871 | 167 | 1 |

|                    |                                       |                          |               |               |             |
|--------------------|---------------------------------------|--------------------------|---------------|---------------|-------------|
|                    | 28-05-2020 17:23:18                   | 7500                     | 195           | 1             |             |
|                    | 28-05-2020 17:24:18                   | 7577                     | 171           | 0             |             |
|                    | <b>Average particles</b>              | <b>7682</b>              | <b>178</b>    | <b>1</b>      |             |
|                    | <b>% Filter collection efficiency</b> | <b>96.48%</b>            | <b>99.79%</b> | <b>99.97%</b> |             |
| Sample H500-8      | 28-05-2020 17:25:55                   | 5589                     | 104           | 0             |             |
|                    | 28-05-2020 17:26:55                   | 5422                     | 81            | 0             |             |
|                    | 28-05-2020 17:27:55                   | 5651                     | 109           | 0             |             |
|                    | 28-05-2020 17:28:55                   | 5509                     | 130           | 1             |             |
|                    | <b>Average particles</b>              | <b>5543</b>              | <b>106</b>    | <b>0</b>      |             |
|                    | <b>% Filter collection efficiency</b> | <b>97.46%</b>            | <b>99.88%</b> | <b>99.98%</b> |             |
| Triple layer, H500 | Background measurement                | 28-05-2020 17:30:25      | 210249        | 85747         | 2532        |
|                    |                                       | 28-05-2020 17:31:25      | 209445        | 85859         | 2592        |
|                    |                                       | 28-05-2020 17:32:25      | 207826        | 85073         | 2736        |
|                    |                                       | 28-05-2020 17:33:25      | 207924        | 84831         | 2545        |
|                    |                                       | <b>Average particles</b> | <b>208861</b> | <b>85378</b>  | <b>2601</b> |
| Sample H500-9      | 28-05-2020 17:34:59                   | 1747                     | 176           | 26            |             |
|                    | 28-05-2020 17:35:59                   | 1601                     | 30            | 0             |             |
|                    | 28-05-2020 17:36:59                   | 1659                     | 34            | 0             |             |
|                    | 28-05-2020 17:37:59                   | 1512                     | 31            | 0             |             |
|                    | <b>Average particles</b>              | <b>1630</b>              | <b>68</b>     | <b>7</b>      |             |
|                    | <b>% Filter collection efficiency</b> | <b>99.22%</b>            | <b>99.92%</b> | <b>99.75%</b> |             |
| Sample H500-10     | 28-05-2020 17:39:33                   | 1984                     | 38            | 1             |             |
|                    | 28-05-2020 17:40:33                   | 2123                     | 22            | 0             |             |
|                    | 28-05-2020 17:41:33                   | 2098                     | 21            | 0             |             |
|                    | 28-05-2020 17:42:33                   | 2049                     | 30            | 0             |             |
|                    | <b>Average particles</b>              | <b>2064</b>              | <b>28</b>     | <b>0</b>      |             |
|                    | <b>% Filter collection efficiency</b> | <b>99.01%</b>            | <b>99.97%</b> | <b>99.99%</b> |             |

|                                       |                        |                     |               |               |      |
|---------------------------------------|------------------------|---------------------|---------------|---------------|------|
| Sample H500-11                        | 28-05-2020 17:44:46    | 1407                | 17            | 0             |      |
|                                       | 28-05-2020 17:45:46    | 1423                | 17            | 1             |      |
|                                       | 28-05-2020 17:46:46    | 1431                | 19            | 0             |      |
|                                       | 28-05-2020 17:47:46    | 1489                | 14            | 0             |      |
| <b>Average particles</b>              |                        | <b>1438</b>         | <b>17</b>     | <b>0</b>      |      |
| <b>% Filter collection efficiency</b> |                        | <b>99.31%</b>       | <b>99.98%</b> | <b>99.99%</b> |      |
| Sample H500-12                        | 28-05-2020 17:49:29    | 1861                | 33            | 0             |      |
|                                       | 28-05-2020 17:50:29    | 1700                | 34            | 2             |      |
|                                       | 28-05-2020 17:51:29    | 1782                | 20            | 0             |      |
|                                       | 28-05-2020 17:52:29    | 1808                | 28            | 0             |      |
| <b>Average particles</b>              |                        | <b>1788</b>         | <b>29</b>     | <b>1</b>      |      |
| <b>% Filter collection efficiency</b> |                        | <b>99.14%</b>       | <b>99.97%</b> | <b>99.98%</b> |      |
| <b>White layer only, H500</b>         | Background measurement | 28-05-2020 17:54:00 | 211665        | 89667         | 3241 |
|                                       |                        | 28-05-2020 17:55:00 | 209972        | 89847         | 3322 |
|                                       |                        | 28-05-2020 17:56:00 | 211880        | 90592         | 3647 |
|                                       |                        | 28-05-2020 17:57:00 | 207552        | 88315         | 3189 |
| <b>Average particles</b>              |                        | <b>210267</b>       | <b>89605</b>  | <b>3350</b>   |      |
| Sample H500-13                        | 28-05-2020 17:58:34    | 59356               | 7963          | 19            |      |
|                                       | 28-05-2020 17:59:34    | 59592               | 7942          | 18            |      |
|                                       | 28-05-2020 18:00:34    | 60115               | 7961          | 18            |      |
|                                       | 28-05-2020 18:01:34    | 61005               | 8309          | 16            |      |
| <b>Average particles</b>              |                        | <b>60017</b>        | <b>8044</b>   | <b>18</b>     |      |
| <b>% Filter collection efficiency</b> |                        | <b>71.46%</b>       | <b>91.02%</b> | <b>99.47%</b> |      |
| Sample H500-14                        | 28-05-2020 18:03:13    | 68823               | 10287         | 23            |      |
|                                       | 28-05-2020 18:04:13    | 68522               | 10340         | 27            |      |
|                                       | 28-05-2020 18:05:13    | 68967               | 10422         | 32            |      |
|                                       | 28-05-2020 18:06:13    | 69560               | 10846         | 27            |      |
| <b>Average particles</b>              |                        | <b>68968</b>        | <b>10474</b>  | <b>27</b>     |      |

**% Filter collection efficiency    67.20%    88.31%    99.19%**

|                |                     |       |       |    |
|----------------|---------------------|-------|-------|----|
| Sample H500-15 | 28-05-2020 18:07:42 | 69118 | 10730 | 33 |
|                | 28-05-2020 18:08:42 | 69262 | 10496 | 37 |
|                | 28-05-2020 18:09:42 | 69341 | 10653 | 41 |
|                | 28-05-2020 18:10:42 | 68468 | 10452 | 41 |

|                                       |               |               |               |
|---------------------------------------|---------------|---------------|---------------|
| <b>Average particles</b>              | <b>69047</b>  | <b>10583</b>  | <b>38</b>     |
| <b>% Filter collection efficiency</b> | <b>67.16%</b> | <b>88.19%</b> | <b>98.87%</b> |

|                |                     |       |      |    |
|----------------|---------------------|-------|------|----|
| Sample H500-16 | 28-05-2020 18:12:05 | 54065 | 6368 | 22 |
|                | 28-05-2020 18:13:05 | 53970 | 6393 | 20 |
|                | 28-05-2020 18:14:05 | 53982 | 6406 | 26 |
|                | 28-05-2020 18:15:05 | 54042 | 6360 | 11 |

|                                       |               |               |               |
|---------------------------------------|---------------|---------------|---------------|
| <b>Average particles</b>              | <b>54015</b>  | <b>6382</b>   | <b>20</b>     |
| <b>% Filter collection efficiency</b> | <b>74.31%</b> | <b>92.88%</b> | <b>99.41%</b> |

**Blue Layer only, H500**

|                        |                     |        |       |      |
|------------------------|---------------------|--------|-------|------|
| Background measurement | 28-05-2020 18:16:29 | 214102 | 93238 | 3588 |
|                        | 28-05-2020 18:17:29 | 214604 | 93205 | 3550 |
|                        | 28-05-2020 18:18:29 | 213782 | 92229 | 3430 |
|                        | 28-05-2020 18:19:29 | 212550 | 91262 | 3281 |

|                          |               |              |             |
|--------------------------|---------------|--------------|-------------|
| <b>Average particles</b> | <b>213760</b> | <b>92484</b> | <b>3462</b> |
|--------------------------|---------------|--------------|-------------|

|                |                     |       |       |    |
|----------------|---------------------|-------|-------|----|
| Sample H500-17 | 28-05-2020 18:35:52 | 66719 | 10039 | 30 |
|                | 28-05-2020 18:36:52 | 65911 | 10091 | 33 |
|                | 28-05-2020 18:37:52 | 65244 | 10096 | 27 |
|                | 28-05-2020 18:38:52 | 66161 | 10294 | 21 |

|                                       |               |               |               |
|---------------------------------------|---------------|---------------|---------------|
| <b>Average particles</b>              | <b>66009</b>  | <b>10130</b>  | <b>28</b>     |
| <b>% Filter collection efficiency</b> | <b>69.12%</b> | <b>89.05%</b> | <b>99.20%</b> |

|                |                     |       |      |    |
|----------------|---------------------|-------|------|----|
| Sample H500-18 | 28-05-2020 18:40:24 | 62043 | 9003 | 24 |
|                | 28-05-2020 18:41:24 | 61942 | 8695 | 21 |
|                | 28-05-2020 18:42:24 | 61879 | 8869 | 17 |

|                |                                       |               |               |               |
|----------------|---------------------------------------|---------------|---------------|---------------|
|                | 28-05-2020 18:43:24                   | 61894         | 8832          | 21            |
|                | <b>Average particles</b>              | <b>61940</b>  | <b>8850</b>   | <b>21</b>     |
|                | <b>% Filter collection efficiency</b> | <b>71.02%</b> | <b>90.43%</b> | <b>99.40%</b> |
| Sample H500-19 | 28-05-2020 18:44:56                   | 64204         | 9746          | 26            |
|                | 28-05-2020 18:45:56                   | 63711         | 9603          | 22            |
|                | 28-05-2020 18:46:56                   | 63514         | 9634          | 10            |
|                | 28-05-2020 18:47:56                   | 63717         | 9738          | 18            |
|                | <b>Average particles</b>              | <b>63787</b>  | <b>9680</b>   | <b>19</b>     |
|                | <b>% Filter collection efficiency</b> | <b>70.16%</b> | <b>89.53%</b> | <b>99.45%</b> |
| Sample H500-20 | 28-05-2020 18:49:20                   | 62734         | 9460          | 25            |
|                | 28-05-2020 18:50:20                   | 62818         | 9537          | 20            |
|                | 28-05-2020 18:51:20                   | 62134         | 9462          | 18            |
|                | 28-05-2020 18:52:20                   | 62727         | 9585          | 31            |
|                | <b>Average particles</b>              | <b>62603</b>  | <b>9511</b>   | <b>24</b>     |
|                | <b>% Filter collection efficiency</b> | <b>70.71%</b> | <b>89.72%</b> | <b>99.32%</b> |



## Differential Pressure test H500

Unsterilised H500 material (from package)

|              |            |           | cmH2O | Pa     | Pa/cm2 |       |          |
|--------------|------------|-----------|-------|--------|--------|-------|----------|
| White Layer  | Sample H1  | 28/5/2020 | 6.5   | 637.4  | 72.44  | $\mu$ | $\sigma$ |
|              | Sample H2  | 28/5/2020 | 5.4   | 529.6  | 60.18  |       |          |
|              | Sample H3  | 28/5/2020 | 5.1   | 500.1  | 56.83  |       |          |
|              | Sample H4  | 28/5/2020 | 4.5   | 441.3  | 50.15  |       |          |
|              |            |           |       |        |        | 59.9  | 9.3      |
| Blue Layer   | Sample H5  | 28/5/2020 | 3.7   | 362.8  | 41.23  | $\mu$ | $\sigma$ |
|              | Sample H6  | 28/5/2020 | 3.5   | 343.2  | 39.00  |       |          |
|              | Sample H7  | 28/5/2020 | 4     | 392.3  | 44.58  |       |          |
|              | Sample H8  | 28/5/2020 | 4     | 392.3  | 44.58  |       |          |
|              |            |           |       |        |        | 42.3  | 2.7      |
| Single layer | Sample H9  | 28/5/2020 | 9.1   | 892.4  | 101.41 | $\mu$ | $\sigma$ |
|              | Sample H10 | 28/5/2020 | 10.3  | 1010.1 | 114.78 |       |          |
|              | Sample H11 | 28/5/2020 | 9.6   | 941.4  | 106.98 |       |          |
|              | Sample H12 | 28/5/2020 | 10.5  | 1029.7 | 117.01 |       |          |
|              |            |           |       |        |        | 110.0 | 7.2      |
| Double layer | Sample H13 | 28/5/2020 | 20.4  | 2000.6 | 227.34 | $\mu$ | $\sigma$ |
|              | Sample H14 | 28/5/2020 | 18.9  | 1853.5 | 210.62 |       |          |
|              | Sample H15 | 28/5/2020 | 19    | 1863.3 | 211.73 |       |          |
|              | Sample H16 | 28/5/2020 | 20.2  | 1980.9 | 225.11 |       |          |
|              |            |           |       |        |        | 218.7 | 8.7      |
| Triple layer | Sample H17 | 28/5/2020 | 29    | 2843.9 | 323.17 | $\mu$ | $\sigma$ |
|              | Sample H18 | 28/5/2020 | 32.9  | 3226.4 | 366.63 |       |          |
|              | Sample H19 | 28/5/2020 | 29.8  | 2922.4 | 332.09 |       |          |
|              | Sample H20 | 28/5/2020 | 31.1  | 3049.9 | 346.58 |       |          |
|              |            |           |       |        |        | 342.1 | 19.0     |

## Water column pressure test H500

|                                      |                   |                   |            | cm H <sub>2</sub> O |       |          |
|--------------------------------------|-------------------|-------------------|------------|---------------------|-------|----------|
| Unsterilised material (from package) | White Layer H500  | Sample PT-H500-1  | 28/05/2020 | 82                  |       |          |
|                                      |                   | Sample PT-H500-2  | 28/05/2020 | 104                 |       |          |
|                                      |                   | Sample PT-H500-3  | 28/05/2020 | 108                 | $\mu$ | $\sigma$ |
|                                      |                   | Sample PT-H500-4  | 28/05/2020 | 93                  | 96.8  | 11.7     |
| Blue Layer H500                      | Blue Layer H500   | Sample PT-H500-5  | 28/05/2020 | 76                  |       |          |
|                                      |                   | Sample PT-H500-6  | 28/05/2020 | 81                  |       |          |
|                                      |                   | Sample PT-H500-7  | 28/05/2020 | 83                  | $\mu$ | $\sigma$ |
|                                      |                   | Sample PT-H500-8  | 28/05/2020 | 83                  | 80.8  | 3.3      |
| Single Layer H500                    | Single Layer H500 | Sample PT-H500-9  | 28/05/2020 | 129                 |       |          |
|                                      |                   | Sample PT-H500-10 | 28/05/2020 | 124                 |       |          |
|                                      |                   | Sample PT-H500-11 | 28/05/2020 | 128                 | $\mu$ | $\sigma$ |
|                                      |                   | Sample PT-H500-12 | 28/05/2020 | 121                 | 125.5 | 3.7      |
| Double Layer H500                    | Double Layer H500 | Sample PT-H500-13 | 28/05/2020 | 128                 |       |          |
|                                      |                   | Sample PT-H500-14 | 28/05/2020 | 142                 |       |          |
|                                      |                   | Sample PT-H500-15 | 28/05/2020 | 129                 | $\mu$ | $\sigma$ |
|                                      |                   | Sample PT-H500-16 | 28/05/2020 | 146                 | 136.3 | 9.1      |
| Triple Layer H500                    | Triple Layer H500 | Sample PT-H500-17 | 28/05/2020 | 141                 |       |          |
|                                      |                   | Sample PT-H500-18 | 28/05/2020 | 146                 |       |          |
|                                      |                   | Sample PT-H500-19 | 28/05/2020 | 155                 | $\mu$ | $\sigma$ |
|                                      |                   | Sample PT-H500-20 | 28/05/2020 | 160                 | 150.5 | 8.6      |
